# Supplementary material for: Mechano-biological and bio-mechanical pathways in cutaneous wound healing
Source: PubMed Central journal article supplement (PMC10030043; doi:10.1371/journal.pcbi.1010902), 2023-03-09

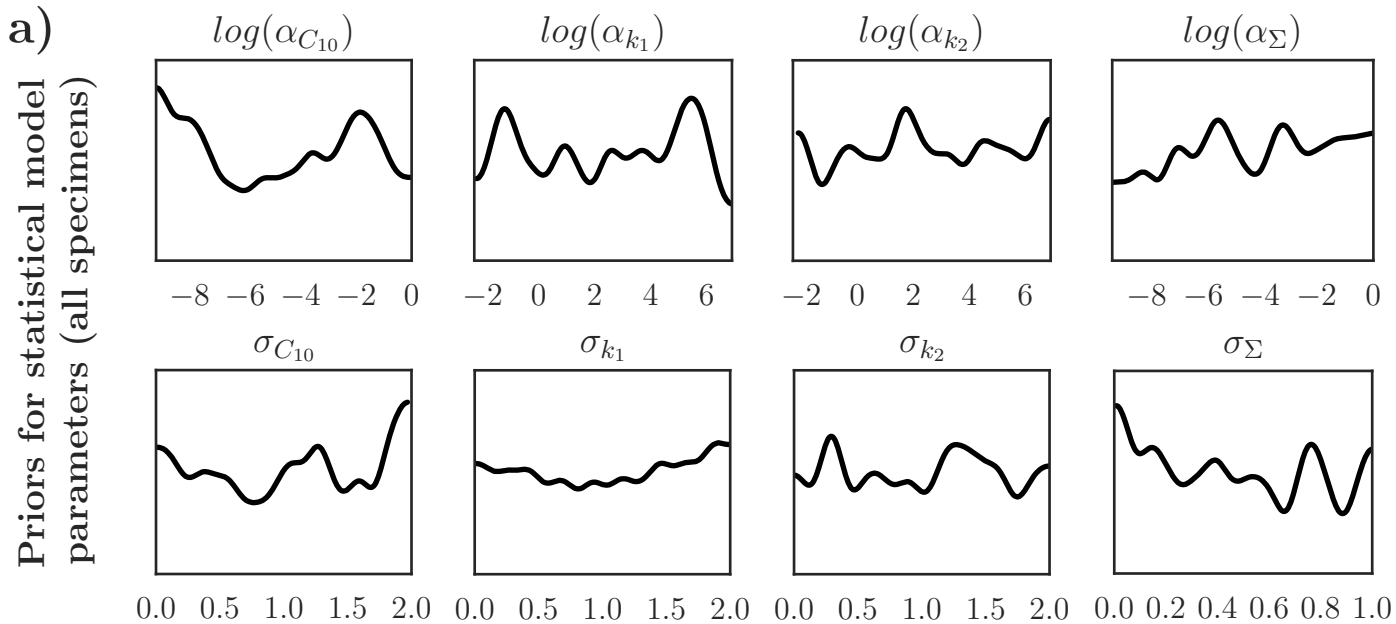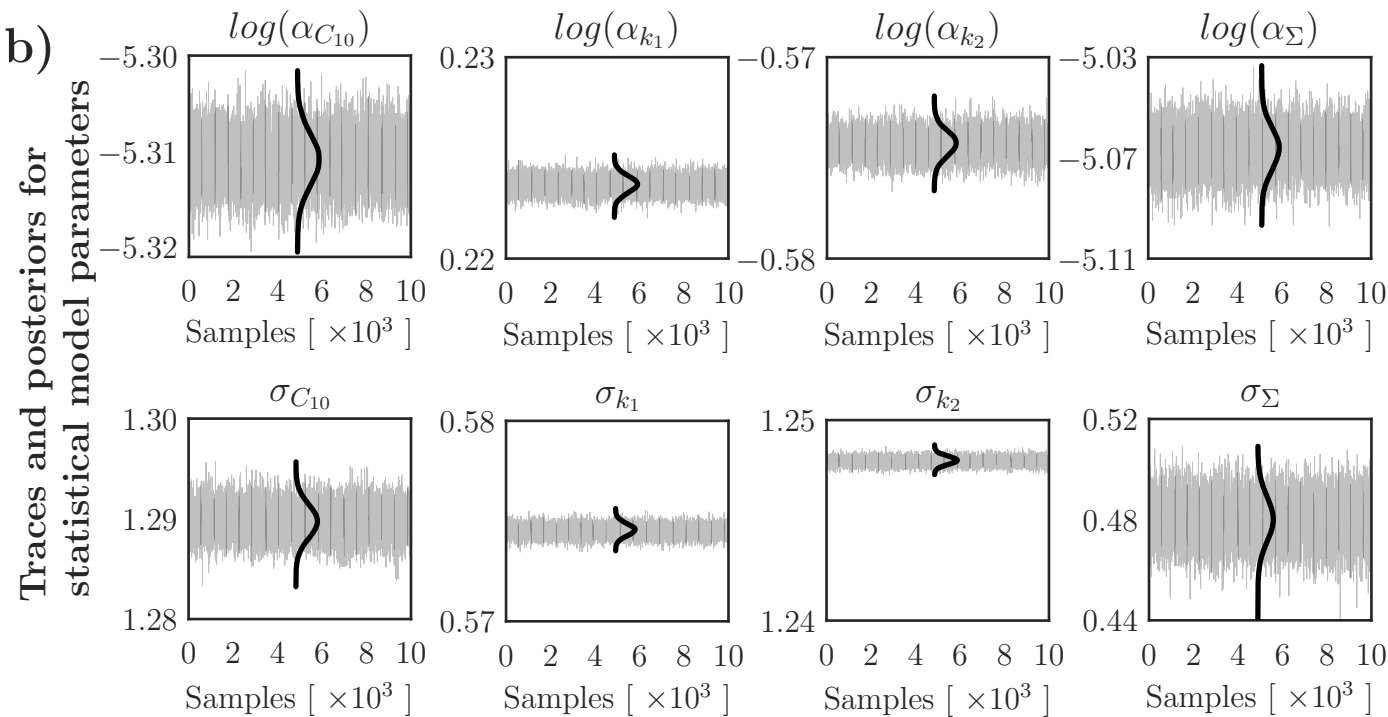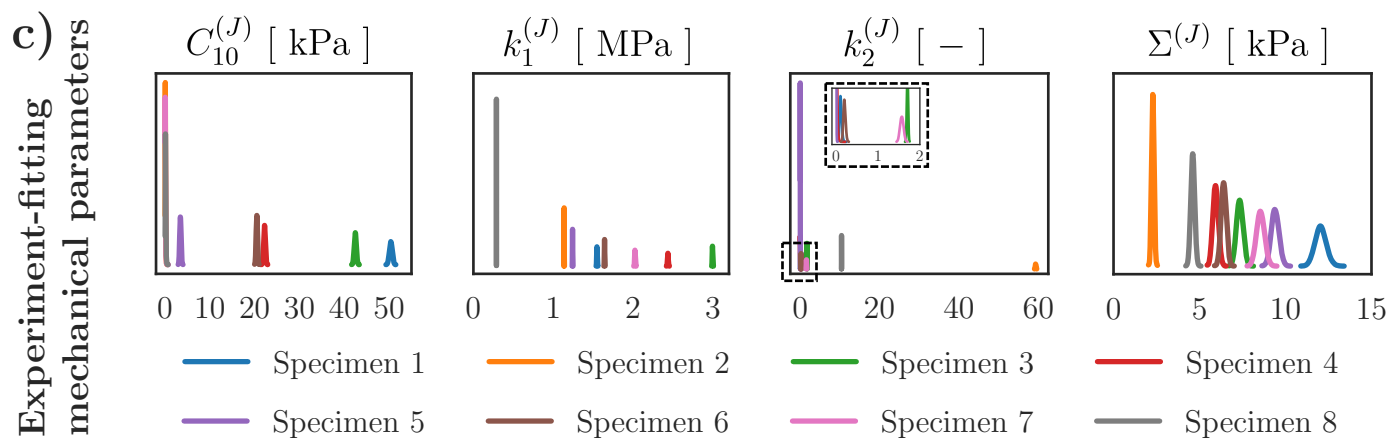

Supplement: pcbi.1010902.s002.pdf [file pcbi.1010902.s002.pdf]
