# Supplementary material for: Mechano-biological and bio-mechanical pathways in cutaneous wound healing
Source: PubMed Central journal article supplement (PMC10030043; doi:10.1371/journal.pcbi.1010902), 2023-03-09
Supplement: pcbi.1010902.s012.pdf [file pcbi.1010902.s012.pdf]

**S2 Appendix. Sensitivity of  $s_\rho$  to  $\Omega^m$  for sub-physiological elastic stretch.**

In Fig. 7, we have shown that assuming a stretch-mediated mechanobiological coupling yields a marked decrease in  $\rho$  and other variables in the wound when increasing the strength of the coupling ( $\Omega^m$ ), a behavior that we have explained in terms of the sub-physiological elastic deformation in the wound that results from imposing an initially stress-free fibrin clot. Here, we further analyze the link between  $\rho$  and  $\Omega^m$  by analytically computing the derivative of the source term in Eq. (6),  $s_\rho$ , with respect to the parameter defining the coupling strength,  $\Omega^m$ :

$$\frac{\partial s_\rho}{\partial \Omega^m} = \rho p_{\rho,n} \left( 1 - \frac{\rho}{K_{\rho,\rho}} \right) \hat{H}(\theta^e, \vartheta^{ph}, \gamma^e) - \rho \frac{\partial d_\rho}{\partial \Omega^m}, \quad (\text{A2.1})$$

where  $d_\rho$  depends on  $\Omega^m$  through the homeostasis constraint imposed considering an unwounded and physiologically-loaded tissue

$$d_\rho = p_{\rho,n} \left( 1 + \frac{\Omega^b}{K_{c,c} + 1} + \frac{\Omega^m}{2} \right) \left( 1 - \frac{1}{K_{\rho,\rho}} \right), \quad (\text{A2.2})$$

such that

$$\frac{\partial s_\rho}{\partial \Omega^m} = \frac{\rho p_{\rho,n}}{2} \left[ 2\hat{H}(\theta^e, \vartheta^{ph}, \gamma^e) \left( 1 - \frac{\rho}{K_{\rho,\rho}} \right) - \left( 1 - \frac{1}{K_{\rho,\rho}} \right) \right]. \quad (\text{A2.3})$$

Since we are considering sub-physiological values of the elastic deformation, we can use the inequality  $\hat{H}(\theta^e, \vartheta^{ph}, \gamma^e) < 1/2$  to write

$$\frac{\partial s_\rho}{\partial \Omega^m} < \frac{p_{\rho,n}}{2K_{\rho,\rho}} \rho (1 - \rho), \quad (\text{A2.4})$$

whose right-hand side term provides an upper bound for  $\partial s_\rho / \partial \Omega^m$  and has sign depending on  $\rho$ , indicating that  $s_\rho$  will decrease for increasing  $\Omega^m$  for values of  $\rho \geq 1$  when  $\theta^e < \vartheta^{ph}$ .
