# Supplementary material for: Mechano-biological and bio-mechanical pathways in cutaneous wound healing
Source: PubMed Central journal article supplement (PMC10030043; doi:10.1371/journal.pcbi.1010902), 2023-03-09
Supplement: pcbi.1010902.s013.pdf [file pcbi.1010902.s013.pdf]

### S3 Appendix. Equilibrium points for ODE system comprising Eqs. (7,7,18).

In Fig. 8, we have observed that a sufficiently large value of  $\Omega^m$ , *e.g.*  $\Omega^m = 0.8$ , induces sustained overexpression of  $\rho$ ,  $\phi_c$ ,  $\xi_c$ , and  $k_1$  throughout the simulated wound healing time span. To provide an explanation for this peculiar behavior, we study the equilibrium of the ODE system comprising Eqs. (6,7,18), where the definitions of  $k_1$  and  $\hat{H}$  are given in Eq. (17) and Eq. (19), respectively. This system of equations can be regarded as descriptive of a 0-dimensional tissue region lacking any biochemical field diffusion (Eq. 3) or ECM remodeling (Eq. (8)). Note that we exclude Eq. (5) from the ODE system, and thus set  $c = 1$ , corresponding to the assumption of a negligible contribution of the secondary inflammation wave on the long-term tissue behavior. Focusing on the region of space  $\rho \times \phi_c \times \xi_c = [0; 8] \times [0; 3] \times [0; 3]$ , we set the model parameters to the values indicated in S3 Table and S4 Table and identify the loci of points satisfying the conditions  $s_\rho = 0$ ,  $\dot{\phi}_c = 0$ , and  $\dot{\xi}_c$ , respectively. More explicitly, we solve each of the following nonlinear algebraic equations for alternative choices of  $\Omega^m$ , knowing that the system will be in equilibrium when all equations are satisfied:

$$\begin{aligned}
0 &= p_{\rho,n} \left( 1 + \frac{\Omega_\rho^b}{K_{\rho,c} + 1} + \Omega^m \hat{H} \right) \left( 1 - \frac{\rho}{K_{\rho,\rho}} \right) \rho - d_\rho \rho \\
0 &= p_{\phi_c,n} \left( 1 + \frac{\Omega_{\phi_c}^b}{K_{\phi_c,c} + 1} + \Omega^m \hat{H} \right) \frac{\rho}{K_{\phi_c,\rho} + \phi_c} - (d_{\phi_c} + \rho d_{\phi_c,\rho,c}) \phi_c \\
0 &= \frac{p_{\xi_c,\phi_c}}{K_{\xi_c,\phi_c} + \xi_c} \phi_c - \left[ d_{\xi_c} + d_{\xi_c,\phi_c} - (d_{\phi_c} + \rho d_{\phi_c,\rho,c}) \phi_c \right] \xi_c
\end{aligned} \tag{A3.1}$$

First, we consider the default value  $\Omega^m = 0.01$ . As shown in Fig. A3.1a, the surfaces corresponding to  $s_\rho = 0$  (blue),  $\dot{\phi}_c = 0$  (green),  $\dot{\xi}_c = 0$  (red) intersect along multiple lines, but there are only 2 points where all of them are satisfied, *i.e.* where the system is in equilibrium. One is the trivial solution  $(\rho, \phi_c, \xi_c) = (0, 0, 0)$ , capturing the notion that a system without cells or collagen will not spontaneously accumulate any of these quantities nor crosslinks. Instead, the non-trivial solution  $(\rho, \phi_c, \xi_c) = (1, 1, 1)$  corresponds to the physiological condition and will act as attractor for any tissue in supra-physiological conditions, indicating that the wound behavior shown in Fig. 8 for  $\Omega^m = 0.01$  will eventually evolve towards the physiological state of the unwounded tissue. Similar observations hold for the case  $\Omega^m = 0.4$ , Fig. A3.1b. Conversely, when  $\Omega^m = 0.8$ , the system exhibits 3 non-trivial and 1 trivial equilibrium points (Fig. A3.1c). This phase-space topology implies a bi-stable system, with one stable point continuing to be the physiological equilibrium, and the other stable point corresponding to a fibrotic state. To confirm this, we consider the results of our FE simulations for  $\Omega^m = 0.8$  and represent the streamlines on planes of constant  $\xi_c$ ,  $\rho$ , or  $\phi_c$ , both for the unwounded (far field) and wounded tissue at day 21 post-wounding. As visible in Fig. A3.1d–f, the equilibrium point at  $(1, 1, 1)$  acts as an attractor for the far field (black dot), which will thus eventually return to the physiological state. On the contrary (Fig. A3.1g–i), the day-21 values of  $\rho$ ,  $\phi_c$ , and  $\xi_c$  place the wounded tissue (red dot) in a different landscape region, where the attractor is the point at  $(\rho, \phi_c, \xi_c) = (6.1, 2.4, 1.7)$ , leading the system towards a supra-physiological steady state that corresponds to permanent fibrosis.

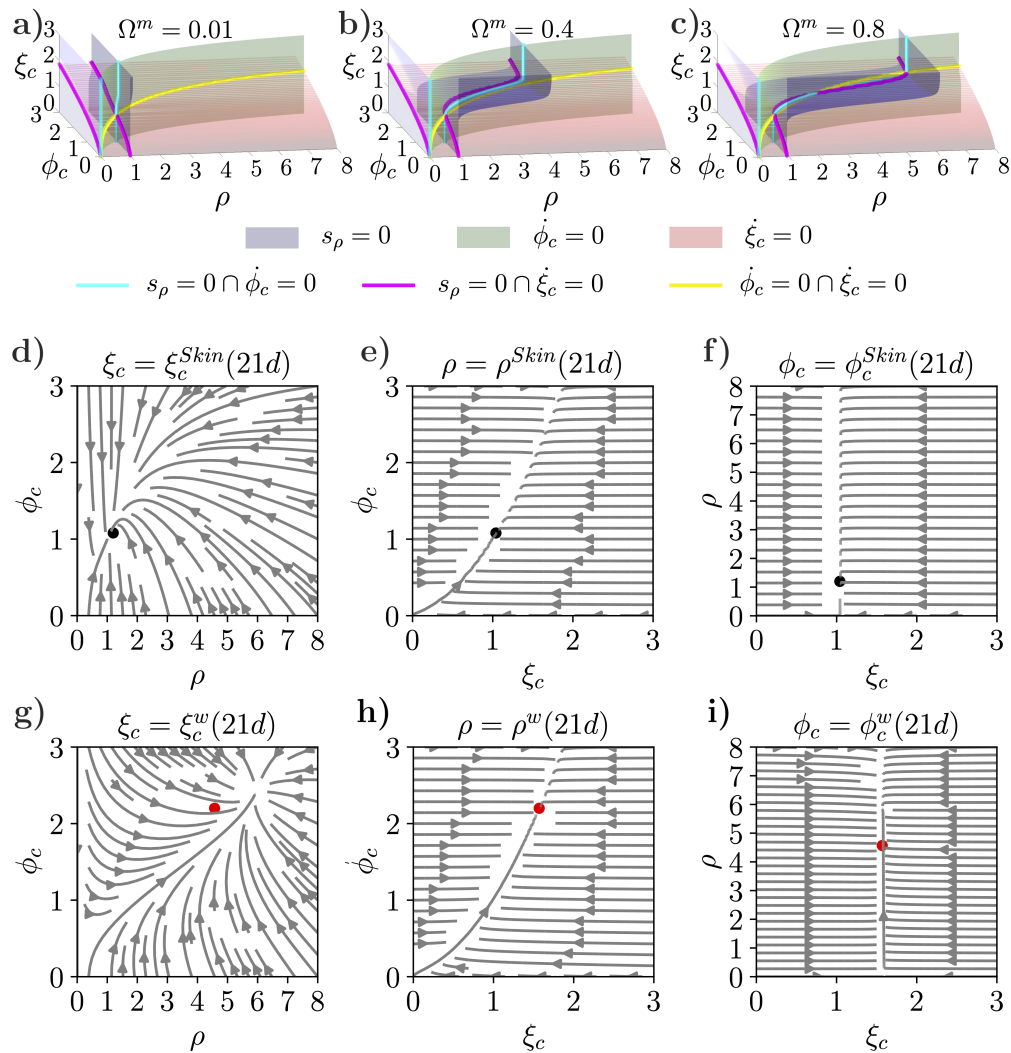

**Figure A3.1.** Stability analysis of an ODE system representative of long-term tissue progression. (a–c) Loci of points independently satisfying the conditions  $s_\rho = 0$  (blue surface),  $\dot{\phi}_c = 0$  (green surface), and  $\dot{\xi}_c = 0$  (red surface), as well as their intersections (cyan, magenta, and yellow lines). Line intersections identify equilibrium points for the ODE system. The phase-space topology, and thus the number of equilibrium points, is affected by the value of the coupling parameter  $\Omega^m$ . (d–f) Streamlines on planes of constant  $\xi_c$ ,  $\rho$ , or  $\phi_c$  for unwounded skin tissue and  $\Omega^m = 0.8$ . The black dot indicates the state of skin at day 21 post-wounding, as obtained from FE simulations. (g–i) Streamlines on planes of constant  $\xi_c$ ,  $\rho$ , or  $\phi_c$  for wounded tissue and  $\Omega^m = 0.8$ . The red dot indicates the state of the wound at day 21 post-wounding, as obtained from FE simulations.
