# Supplementary material for: Mechano-biological and bio-mechanical pathways in cutaneous wound healing
Source: PubMed Central journal article supplement (PMC10030043; doi:10.1371/journal.pcbi.1010902), 2023-03-09
Supplement: pcbi.1010902.s014.pdf [file pcbi.1010902.s014.pdf]

S1 Table. Search ranges for Bayesian model parameters.

| Model parameter   | Search range    |
|-------------------|-----------------|
| $\alpha_{C_{10}}$ | 0.0001 – 1 MPa  |
| $\alpha_{k_1}$    | 0.1 – 1'000 MPa |
| $\alpha_{k_2}$    | 0.1 – 1'000     |
| $\alpha_{\Sigma}$ | 0.0001 – 1 MPa  |
| $\sigma_{C_{10}}$ | 0 – 2           |
| $\sigma_{k_1}$    | 0 – 2           |
| $\sigma_{k_2}$    | 0 – 2           |
| $\sigma_{\Sigma}$ | 0 – 1           |
