# Supplementary material for: Mechano-biological and bio-mechanical pathways in cutaneous wound healing
Source: PubMed Central journal article supplement (PMC10030043; doi:10.1371/journal.pcbi.1010902), 2023-03-09
Supplement: pcbi.1010902.s016.pdf [file pcbi.1010902.s016.pdf]

**S3 Table. Parameters for diffusible biochemical fields.**

| Parameter                                                                               | Value                                 | Eq. | Source                                   |
|-----------------------------------------------------------------------------------------|---------------------------------------|-----|------------------------------------------|
| $D_{\alpha,\alpha}$ : diffusion coefficient for 1 <sup>st</sup> inflammatory wave       | 0.075 mm <sup>2</sup> /h              | 3   | Assumed = $D_{c,c}$                      |
| $d_\alpha$ : decay coefficient for 1 <sup>st</sup> inflammatory wave                    | 0.01 1/h                              | 4   | Assumed = $d_c$                          |
| $D_{c,c}$ : diffusion coefficient for 2 <sup>nd</sup> inflammatory wave                 | 0.075 mm <sup>2</sup> /h              | 3   | Ref. [1]                                 |
| $d_c$ : decay coefficient for 2 <sup>nd</sup> inflammatory wave                         | 0.01 1/h                              | 5   | Ref. [1]                                 |
| $p_{c,\alpha}$ : effect of 1 <sup>st</sup> inflammation on 2 <sup>nd</sup> inflammation | 0.23 1/h                              | 5   | Selected to match peak in $c$            |
| $p_{c,\rho}$ : effect of cell proliferation on 2 <sup>nd</sup> inflammation             | 1.5 1/h                               | 5   | Ref. [2]                                 |
| $c_{tgt}$ : attractor for 2 <sup>nd</sup> inflammation                                  | 1.01                                  | 5   | From $c$ homeostasis ( $s_c = 0$ )       |
| $K_{c,c}$ : self-saturation of 2 <sup>nd</sup> inflammatory wave                        | 0.5                                   | 5   | Assumed                                  |
| $D_{\rho,\rho}$ : diffusion coefficient for cell population                             | 0.035 mm <sup>2</sup> /h              | 3   | Ref. [1]                                 |
| $D_{\rho,c}$ : chemotactic diffusion coefficient for cells                              | $8 \times 10^{-5}$ mm <sup>2</sup> /h | 3   | Ref. [1]                                 |
| $p_{\rho,n}$ : baseline cell mitotic rate for $c = 0$ and $\hat{H}_\rho = 0$            | 0.034 1/h                             | 6   | Ref. [1]                                 |
| $\Omega_\rho^b$ : enhanced cell proliferation due to inflammation                       | 5                                     | 6   | Selected to match peak in $\rho$         |
| $\Omega_\rho^m$ : enhanced cell proliferation due to mechanics                          | 0.01<br>(Range: 0 – 0.8)              | 6   | Ref. [3], varied in Figs. 7-8            |
| $d_\rho$ : decay coefficient for cell population                                        | 0.048 1/h<br>(0.048 – 0.061 1/h)      | 6   | From $\rho$ homeostasis ( $s_\rho = 0$ ) |
| $\gamma^e$ : slope of the function $\hat{H}(\theta^e, \vartheta^{ph}, \gamma^e)$        | 5                                     | 10  | Ref. [1]                                 |
| $\gamma^{k_1}$ : slope of the function $\hat{H}(c, k_1^c, k_1^{ph}, \gamma^{k_1})$      | 0.016                                 | 19  | Assumed                                  |
| $K_{\rho,\rho}$ : self-saturation of cell population                                    | 30                                    | 6   | Selected to match peak in $\rho$         |
| $K_{\rho,c}$ : saturation of cell population due to inflammation                        | 10                                    | 6   | Selected to match peak in $\rho$         |
| $f_{\rho,n}$ : baseline active tension for $\rho = 1$ and $c = 0$                       | 0.04 MPa/mm <sup>3</sup>              | 11  | Ref. [1]                                 |
| $K_{f,c}$ : saturation of active tension due to inflammation                            | $10^{-5}$                             | 11  | Ref. [1]                                 |
| $\Omega_f^b$ : increase of active tension due to inflammation                           | 1                                     | 11  | Ref. [1]                                 |

## References

1. Buganza Tepole A. Computational systems mechanobiology of wound healing. Computer Methods in Applied Mechanics and Engineering. 2017;314:46–70.
2. Li D, Lee S, Tseng S. Differential expression and regulation of TGF-beta1, TGF-beta2, TGF-beta3, TGF-betaRI, TGF-betaRII and TGF-betaRIII in cultured human corneal, limbal, and conjunctival fibroblasts. Current eye research. 1999;19(2):154–161.
3. Yang G, Crawford RC, Wang JH. Proliferation and collagen production of human patellar tendon fibroblasts in response to cyclic uniaxial stretching in serum-free conditions. Journal of biomechanics. 2004;37(10):1543–1550.
