# Supplementary material for: Mechano-biological and bio-mechanical pathways in cutaneous wound healing
Source: PubMed Central journal article supplement (PMC10030043; doi:10.1371/journal.pcbi.1010902), 2023-03-09
Supplement: pcbi.1010902.s017.pdf [file pcbi.1010902.s017.pdf]

**S4 Table. Parameters for microstructural fields.**

| Parameter                                                                        | Value                                  | Eq. | Source                                           |
|----------------------------------------------------------------------------------|----------------------------------------|-----|--------------------------------------------------|
| $p_{\phi_c, n}$ : rate of collagen deposition for $c = 0$ and $\hat{H}_{\phi_c}$ | 0.002 1/h                              | 7   | Ref. [1]                                         |
| $\Omega_{\phi_c}^b$ : enhanced $\phi_c$ deposition due to cell proliferation     | 2.5                                    | 7   | Selected to match peak in $\phi_c$               |
| $\Omega_{\phi_c}^m$ : enhanced $\phi_c$ deposition due to mechanics              | $= \Omega_{\rho}^m$                    | 7   | Assumed                                          |
| $K_{\phi_c, c}$ : saturation of collagen due to inflammation                     | $10^{-4}$                              | 7   | Ref. [1]                                         |
| $K_{\phi_c, \rho}$ : saturation of collagen due to cell proliferation            | 1.06                                   | 7   | Ref. [1]                                         |
| $d_{\phi_c}$ : decay coefficient for collagen content                            | 0.00292 1/h<br>(0.00291 – 0.00330 1/h) | 7   | From $\phi_c$ homeostasis ( $\dot{\phi}_c = 0$ ) |
| $d_{\phi_c, \rho, c}$ : rate of collagen degradation due to $\rho$ and $c$       | $4.85 \times 10^{-4}$ 1/h              | 7   | Ref. [1]                                         |
| $p_{\xi_c, \phi_c}$ : natural forward rate of collagen crosslinking              | 1 1/h                                  | 18  | Assumed                                          |
| $K_{\xi_c, \phi_c}$ : saturation of crosslinking in response to $\phi_c$         | 0.5                                    | 18  | Assumed                                          |
| $d_{\xi_c}$ : decay coefficient for collagen crosslinking                        | 0.66326 1/h<br>(0.66288 – 0.66327 1/h) | 18  | From $\xi_c$ homeostasis ( $\dot{\xi}_c = 0$ )   |
| $d_{\xi_c, \phi_c}^-$ : reduction of crosslinking due to $\phi_c$ depletion      | 1                                      | 18  | Assumed                                          |
| $a$ : nonlinearity of the relation between $k_1$ and $\xi_c$                     | 10                                     | 17  | Selected to match $k_1$ evolution                |
| $d_{\phi_f^w}$ : decay coefficient for wound fibrin content                      | $= d_{\phi_c}$                         | 15  | Assumed                                          |
| $d_{\phi_f^w, \rho, c}$ : rate of fibrin degradation due to $\rho$ and $c$       | 0.00325 1/h                            | 15  | To have negligible fibrin by d7                  |
| $\tau_{\lambda p}$ : time constant for tissue growth                             | 0.485                                  | 8   | Ref. [1]                                         |

## References

1. Buganza Tepole A. Computational systems mechanobiology of wound healing. Computer Methods in Applied Mechanics and Engineering. 2017;314:46–70.
