# Supplementary material for: Mechano-biological and bio-mechanical pathways in cutaneous wound healing
Source: PubMed Central journal article supplement (PMC10030043; doi:10.1371/journal.pcbi.1010902), 2023-03-09
Supplement: pcbi.1010902.s018.pdf [file pcbi.1010902.s018.pdf]

**S5 Table. Emergent constitutive biomechanical parameters (Eqs. (2,16,17)).**

| Parameter                                             | Value     | Source                                                         |
|-------------------------------------------------------|-----------|----------------------------------------------------------------|
| $C_{10}^{Skin}$ : value for unwounded skin            | 12 kPa    | Median from experiment fitting, Fig. 4a                        |
| $k_1^{Skin}$ : value for unwounded skin               | 1.6 MPa   | Median from experiment fitting Fig. 4b                         |
| $k_2^{Skin}$ : value for unwounded skin               | 0.88 MPa  | Median from experiment fitting Fig. 4c                         |
| $C_{10}^{i.w.}$ : value for just-wounded tissue       | 0.0 kPa   | Due to tissue removal as part of wounding                      |
| $k_1^{i.w.}$ : value for just-wounded tissue          | 0.0 MPa   | Due to tissue removal as part of wounding                      |
| $C_{10}^{Clot, d0}$ : value for a freshly-formed clot | 300.0 kPa | Assumed in line with Ref. [1]                                  |
| $C_{10}^{d0, lb}$ : lower bound for a d0 wound        | 2.5 kPa   | Linear extrapolation from known d7 and d14 values              |
| $C_{10}^{d7, lb}$ : lower bound for a d7 wound        | 1.2 kPa   | 2.5 <sup>th</sup> percentile from experiment fitting, Fig. 4a  |
| $C_{10}^{d14, lb}$ : lower bound for a d14 wound      | 0.0 kPa   | 2.5 <sup>th</sup> percentile from experiment fitting, Fig. 4a  |
| $k_1^{d0, lb}$ : lower bound value for d0 wound       | 0.0 MPa   | = $k_1^{i.w.}$ since no collagen is deposited prior to d0      |
| $k_1^{d7, lb}$ : lower bound value for d7 wound       | 0.6 MPa   | 2.5 <sup>th</sup> percentile from experiment fitting, Fig. 4b  |
| $k_1^{d14, lb}$ : lower bound value for d14 wound     | 1.2 MPa   | 2.5 <sup>th</sup> percentile from experiment fitting, Fig. 4b  |
| $C_{10}^{d0, m}$ : median value for d0 wound          | 51.2 kPa  | Linear extrapolation from known d7 and d14 values              |
| $C_{10}^{d7, m}$ : median value for d7 wound          | 25.9 kPa  | 50 <sup>th</sup> percentile from experiment fitting, Fig. 4a   |
| $C_{10}^{d14, m}$ : median value for d14 wound        | 0.6 kPa   | 50 <sup>th</sup> percentile from experiment fitting, Fig. 4a   |
| $k_1^{d0, m}$ : median value for d0 wound             | 0.0 MPa   | = $k_1^{i.w.}$ since no collagen is deposited prior to d0      |
| $k_1^{d7, m}$ : median value for d7 wound             | 19.0 MPa  | 50 <sup>th</sup> percentile from experiment fitting, Fig. 4b   |
| $k_1^{d14, m}$ : median value for d14 wound           | 9.0 MPa   | 50 <sup>th</sup> percentile from experiment fitting, Fig. 4b   |
| $C_{10}^{d0, ub}$ : upper bound value for d0 wound    | 167.2 kPa | Linear extrapolation from known d7 and d14 values              |
| $C_{10}^{d7, ub}$ : upper bound value for d7 wound    | 94.3 kPa  | 97.5 <sup>th</sup> percentile from experiment fitting, Fig. 4a |
| $C_{10}^{d14, ub}$ : upper bound value for d14 wound  | 21.4 kPa  | 97.5 <sup>th</sup> percentile from experiment fitting, Fig. 4a |
| $k_1^{d0, ub}$ : upper bound value for d0 wound       | 0.0 MPa   | = $k_1^{i.w.}$ since no collagen is deposited prior to d0      |
| $k_1^{d7, ub}$ : upper bound value for d7 wound       | 86.2 MPa  | 97.5 <sup>th</sup> percentile from experiment fitting, Fig. 4b |
| $k_1^{d14, ub}$ : upper bound value for d14 wound     | 148.1 MPa | 97.5 <sup>th</sup> percentile from experiment fitting, Fig. 4b |

## References

1. Lee YU, Lee A, Humphrey J, Rausch M. Histological and biomechanical changes in a mouse model of venous thrombus remodeling. *Biorheology*. 2015;52(3):235–245.
